# Supplementary material for: Constructing interfacial polarization sites within a honeycomb-like porous structureviaa spatially confined-etching strategy for boosting electromagnetic wave absorption
Source: Royal Society of Chemistry journal article supplement (doi:10.1039/d3ta03740a), 2023-01-01
Supplement: d3ta03740a1.pdf [file d3ta03740a1.pdf]

# **Constructing Interfacial Polarization-enhanced Sites within Honeycomb-like Porous Structure via Spatially Confined-Etching Strategy for Boosting Electromagnetic Wave Absorption**

Wenxuan Hou<sup>a</sup>, Baojun Wang<sup>a</sup>, Shikuo Li<sup>a</sup>, Fangzhi Huang<sup>b</sup>, Hengxiu Yang<sup>c,\*</sup>, and Hui Zhang<sup>a,\*</sup>

<sup>a</sup>School of Materials Science and Engineering, Anhui University; Key Laboratory of Structure and Functional Regulation of Hybrid Materials (Anhui University), Ministry of Education; Hefei, 230601, PR China

<sup>b</sup>School of Chemistry and Chemical Engineering, Anhui University, Hefei, 230601, PR China

<sup>c</sup>Guizhou Provincial Key Laboratory of Computational Nano-Material Science, Guizhou Education University, Guiyang, 550018, China

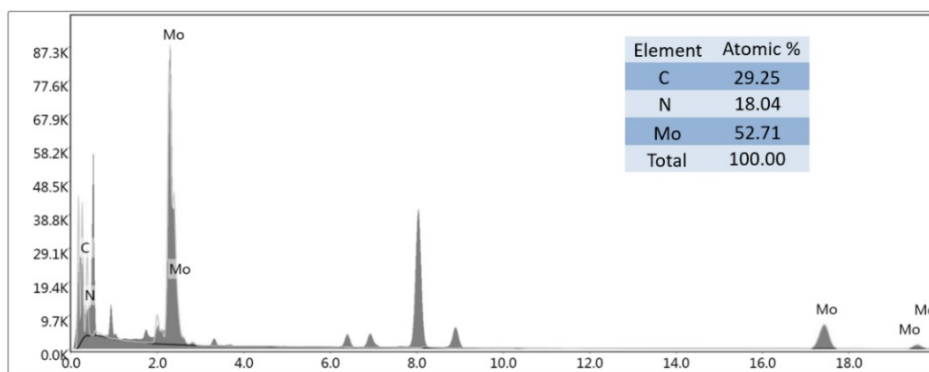

**Fig. S1.** EDX spectrum of MPC-S3 sample.

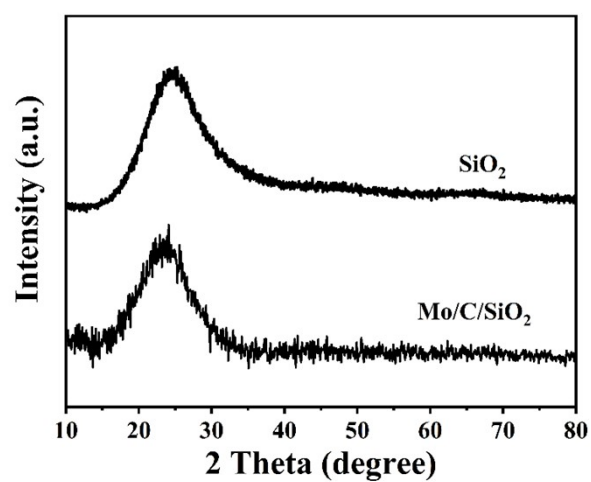

**Fig. S2.** XRD patterns of  $\text{SiO}_2$  and Mo/C/ $\text{SiO}_2$  composite.

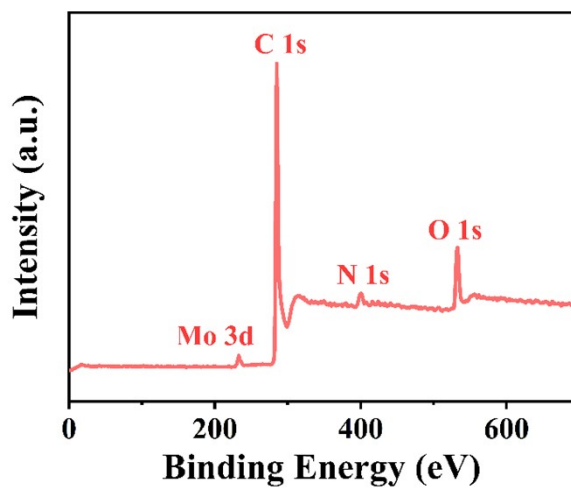

**Fig. S3.** XPS survey of MPC-S3 sample.

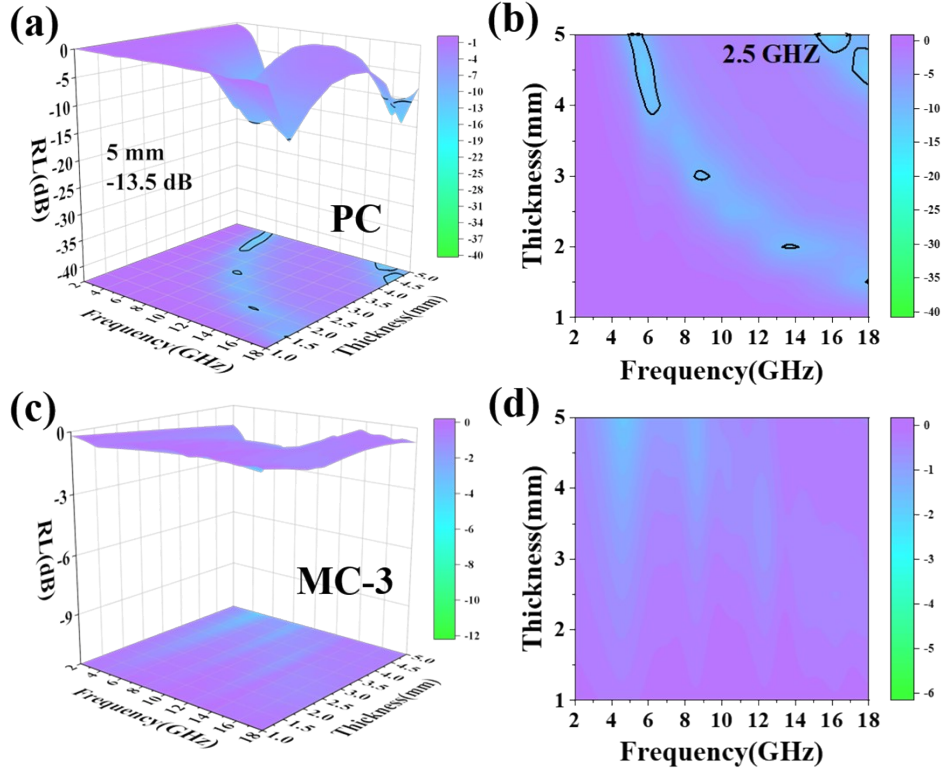

**Fig. S4.** 3D RL and 3D projection plots of (a, b) PC, (c, d) MC-3.

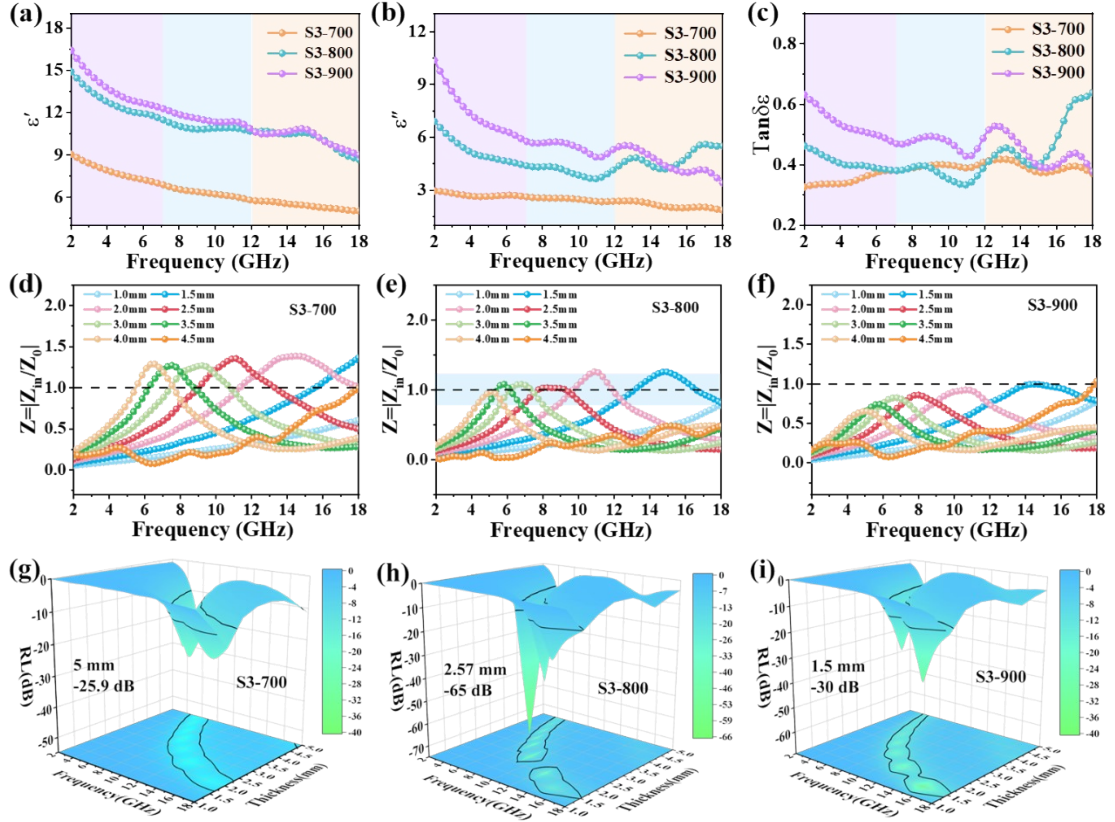

**Fig. S5.** Complex permittivity, impedance matching, and 3D RL maps of (a, d, g) S3-700, (b, e, h) S3-800, (c, f, i) S3-900.

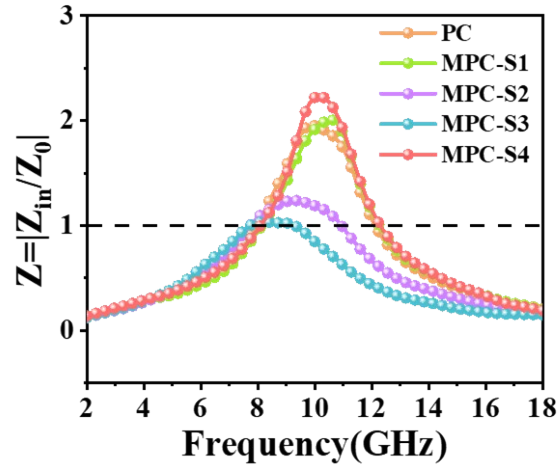

**Fig. S6.** Samples of impedance matching.

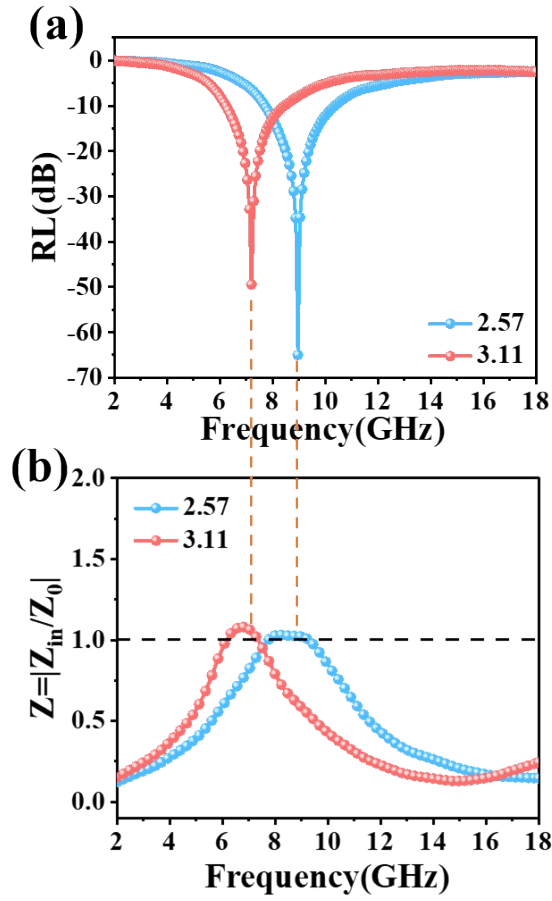

**Fig. S7.** MPC-S3 ( $d = 2.57$  mm and  $3.11$  mm) of (a) RL value, (b) the value of  $Z$ .
